# Supplementary material for: Spatial and Temporal Heterogeneity in High-Grade Serous Ovarian Cancer: A Phylogenetic Analysis
Source: PubMed Central journal article supplement (PMC4339382; doi:10.1371/journal.pmed.1001789), 2015-02-24
Supplement: pmed.1001789.s012.pdf [file pmed.1001789.s012.pdf]

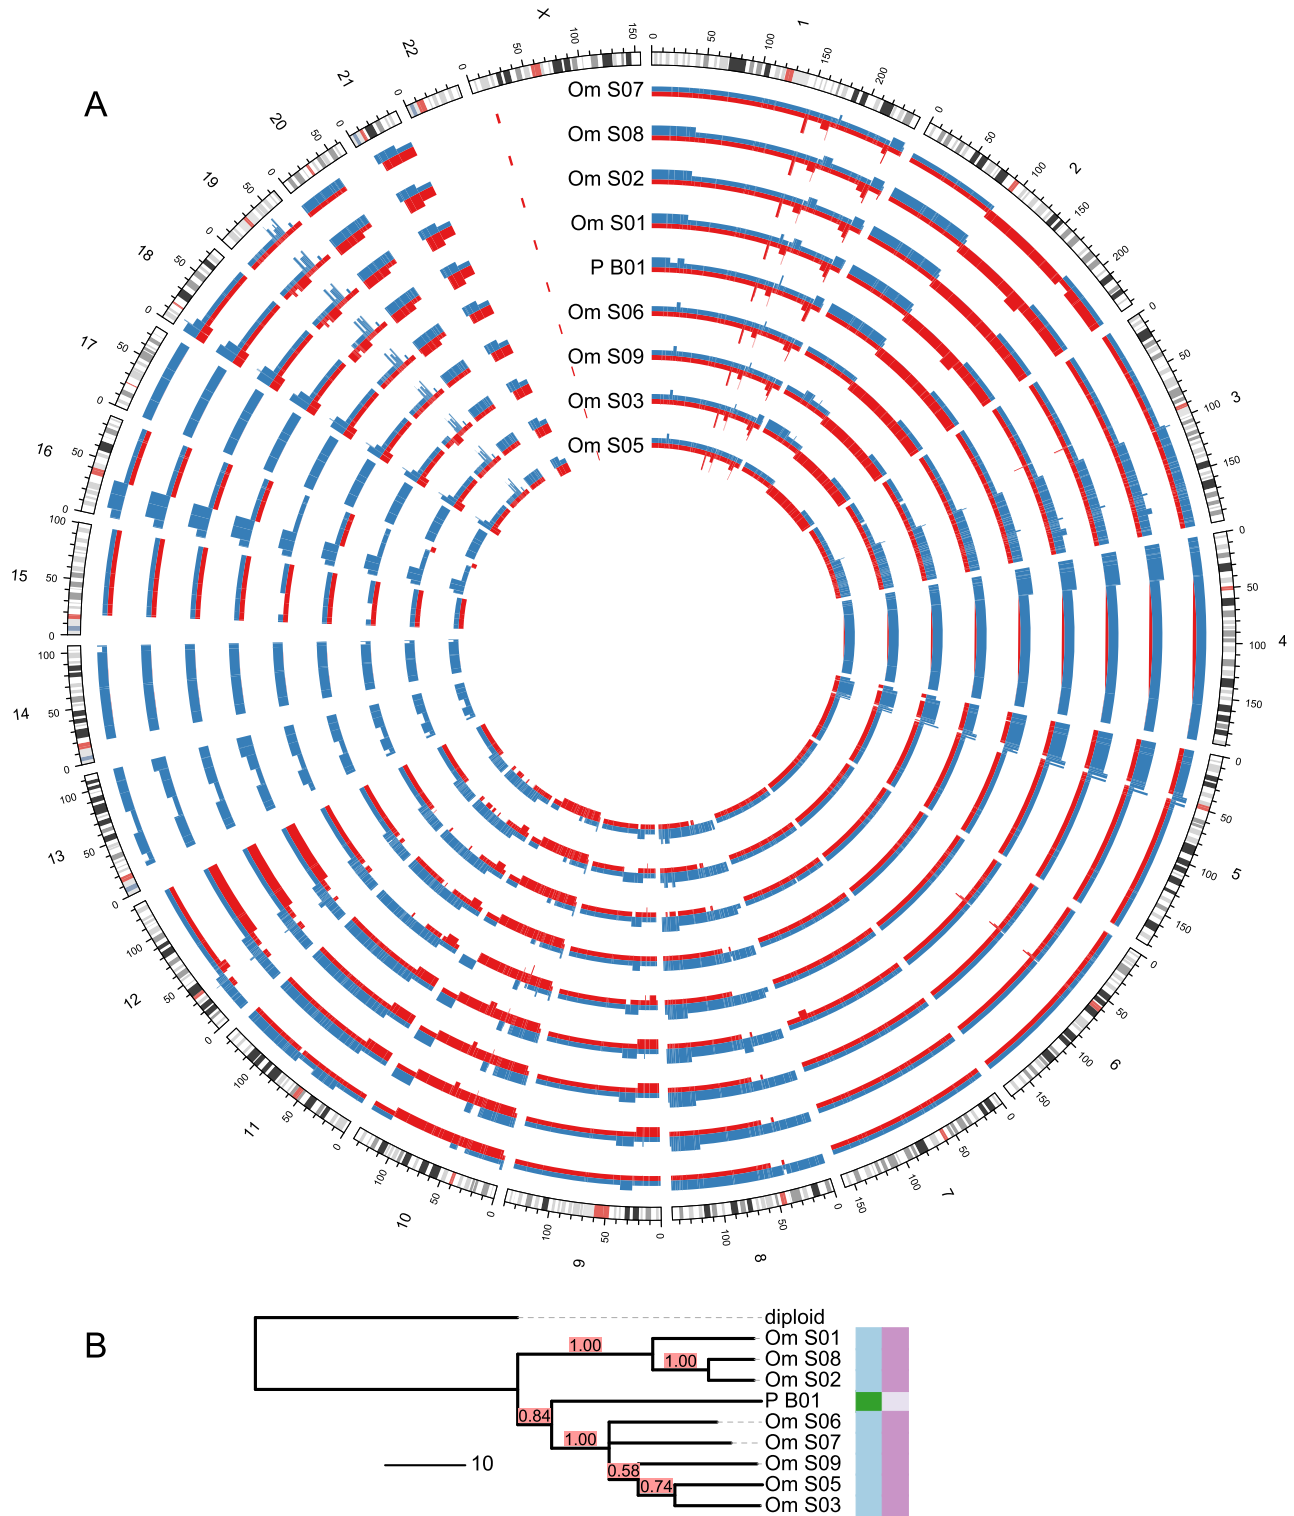

Figure 11: **Copy-number (CN) profiles (A) and evolutionary tree (B) for case 10.** Only selected CN profiles are shown and marked in bold in the evolutionary tree. Individual alleles are colored in red and blue. Confidence values for each split in the tree are given in red boxes. The color bars to the right of the tree indicate different sampling sites (left) and sampling times(right). Branch lengths are give in number of rearrangement events.
