# Supplementary material for: Spatial and Temporal Heterogeneity in High-Grade Serous Ovarian Cancer: A Phylogenetic Analysis
Source: PubMed Central journal article supplement (PMC4339382; doi:10.1371/journal.pmed.1001789), 2015-02-24
Supplement: pmed.1001789.s017.pdf [file pmed.1001789.s017.pdf]

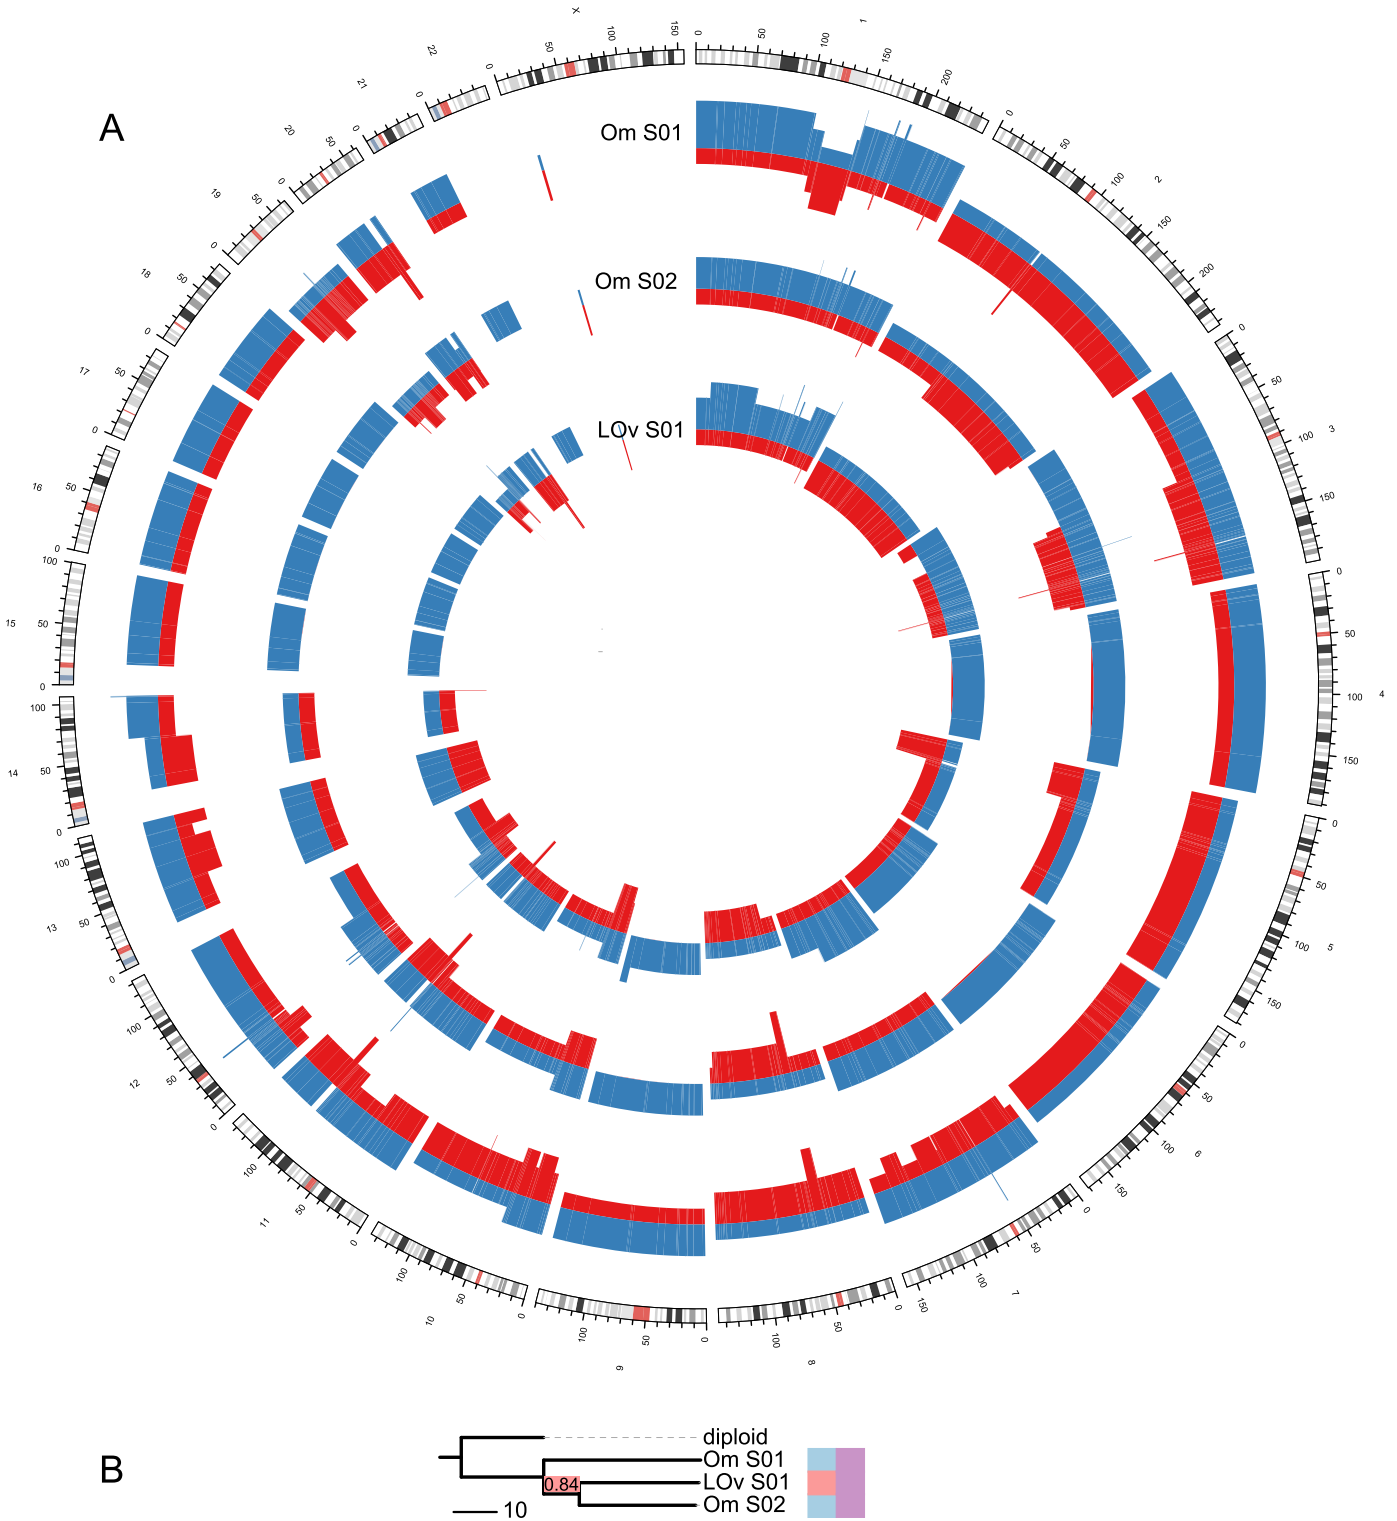

Figure 16: **Copy-number (CN) profiles (A) and evolutionary tree (B) for case 17.** Only selected CN profiles are shown and marked in bold in the evolutionary tree. Individual alleles are colored in red and blue. Confidence values for each split in the tree are given in red boxes. The color bars to the right of the tree indicate different sampling sites (left) and sampling times(right). Branch lengths are given in number of rearrangement events.
