# Supplementary material for: Spatial and Temporal Heterogeneity in High-Grade Serous Ovarian Cancer: A Phylogenetic Analysis
Source: PubMed Central journal article supplement (PMC4339382; doi:10.1371/journal.pmed.1001789), 2015-02-24
Supplement: pmed.1001789.s021.pdf [file pmed.1001789.s021.pdf]

**Table S1: Distribution of samples**

|        | Arrays | Biopsy    |    |    | Surgery |       |    | Relapse |        |         |   |
|--------|--------|-----------|----|----|---------|-------|----|---------|--------|---------|---|
|        |        | Ov/FT     | Om | P  | Others  | Ov/FT | Om | P       | Others | Ascites |   |
| 1      | 16/20  |           |    | 10 |         |       | 6  |         |        |         |   |
| 2      | 3/5    |           |    |    |         |       |    |         | 3      |         |   |
| 3      | 18/20  |           |    |    |         |       | 4  |         | 14     |         |   |
| 4      | 1/3    |           |    | 1  |         |       |    |         |        |         |   |
| 5      | 29/29  |           | 2  |    |         | 1     | 20 |         | 5      | 1       |   |
| 6      | 8/8    |           | 1  |    |         |       | 7  |         |        |         |   |
| 7      | 7/8    |           |    | 2  |         | 1     | 4  |         |        |         |   |
| 8      | 11/11  | 1         | 1  |    |         |       | 8  |         |        | 1       |   |
| 9      | 15/16  |           | 3  |    |         |       | 5  | 1       | 6      |         |   |
| 10     | 9/11   |           |    | 1  |         |       | 8  |         |        |         |   |
| 11     | 7/17   | 1         | 4  |    | 1       | 1     |    |         |        |         |   |
| 12     | 1/4    |           | 1  |    |         |       |    |         |        |         |   |
| 13     | 3/3    |           | 1  |    |         |       |    |         | 2      |         |   |
| 14     | 3/4    |           |    |    | 1       | 1     | 1  |         |        |         |   |
| 15     | 3/5    |           |    |    |         | 3     |    |         |        |         |   |
| 16     | 1/3    |           | 1  |    |         |       |    |         |        |         |   |
| 17     | 3/4    |           |    |    |         | 1     | 2  |         |        |         |   |
| total# | 17     | 138 / 171 | 2  | 14 | 14      | 11    | 8  | 75      | 1      | 11      | 2 |

Table 1: **Distribution of samples from the OV03/OV04 clinical studies across sites and time of sampling.** Table shows eligible patients recruited to the OV03/OV04 clinical studies and the number of samples available for genomic studies collected from various metastatic sites and at biopsy, interval debulking surgery and at relapse. Ov: Ovary; FT: Fallopian tube; Om: Omentum; P: Peritoneum.
