# Supplementary material for: Spatial and Temporal Heterogeneity in High-Grade Serous Ovarian Cancer: A Phylogenetic Analysis
Source: PubMed Central journal article supplement (PMC4339382; doi:10.1371/journal.pmed.1001789), 2015-02-24
Supplement: pmed.1001789.s022.pdf [file pmed.1001789.s022.pdf]

**Table S2: Digital PCR results**

| Case | Mutant | Tissue                  | Type  | Gene count | TP53 mutant | mutant gene/mutant TP53 | Cellularity | WT TP53 | mutant TP53 | AF   |
|------|--------|-------------------------|-------|------------|-------------|-------------------------|-------------|---------|-------------|------|
| 8    | NF1    | Biopsy Site-B01         | FFPE  | 0          | 131         | 0.00                    | NA          | 28      |             | 0.82 |
| 8    | NF1    | Omentum-S01             | FFPE  | 86         | 87          | 0.99                    | 60          | 114     |             | 0.43 |
| 8    | NF1    | Omentum-S02             | FFPE  | 96         | 131         | 0.73                    | 70          | 167     |             | 0.44 |
| 8    | NF1    | Omentum-S03             | FFPE  | 260        | 260         | 1.00                    | 70          | 327     |             | 0.44 |
| 8    | NF1    | Uterus-S01              | FFPE  | 102        | 46          | 2.22                    | 50          | 528     |             | 0.08 |
| 8    | NF1    | Left ovary-S01          | FFPE  | 10         | 126         | 0.08                    | 80          | 92      |             | 0.58 |
| 8    | NF1    | Uteru surface-S01       | FFPE  | 81         | 97          | 0.84                    | 80          | 411     |             | 0.19 |
| 8    | NF1    | Right ovary-S01         | FFPE  | 21         | 178         | 0.12                    | 80          | 927     |             | 0.16 |
| 8    | NF1    | Left fallopian tube-S01 | FFPE  | 3          | 242         | 0.01                    | 80          | 187     |             | 0.56 |
| 8    | NF1    | Left ovary-S01          | FFPE  | 10         | 225         | 0.04                    | 80          | 300     |             | 0.43 |
| 8    | NF1    | Ovary-B01               | fresh | 57         | 1120        | 0.05                    | 80          | 273     |             | 0.80 |
| 8    | NF1    | Omentum-B01             | fresh | 218        | 825         | 0.26                    | 70          | 1204    |             | 0.41 |
| 8    | NF1    | Omentum-S01             | fresh | 43         | 175         | 0.25                    | 40          | 221     |             | 0.44 |
| 8    | NF1    | Omentum-S02             | fresh | 67         | 78          | 0.86                    | 70          | 79      |             | 0.50 |
| 8    | NF1    | Omentum-S03             | fresh | 92         | 104         | 0.89                    | 80          | 108     |             | 0.49 |
| 8    | NF1    | Omentum-S04             | fresh | 73         | 125         | 0.59                    | 80          | 162     |             | 0.44 |
| 8    | NF1    | Omentum-S05             | fresh | 162        | 162         | 1.00                    | 70          | 133     |             | 0.55 |
| 8    | NF1    | Omentum-S06             | fresh | 144        | 173         | 0.83                    | 70          | 181     |             | 0.49 |
| 8    | NF1    | Omentum-S07             | fresh | 126        | 183         | 0.69                    | 90          | 168     |             | 0.52 |
| 8    | NF1    | Omentum-S08             | fresh | 102        | 163         | 0.63                    | 90          | 152     |             | 0.52 |
| 8    | NF1    | Ascites-R01             | fresh | 274        | 324         | 0.85                    | 80          | 1       |             | 1.00 |
| 8    | NF1    | Buffy coat              | fresh | 0          | 0           | 0.00                    | NA          | 550     |             | 0.00 |
| 14   | BRCA2  | Omentum-S01             | FFPE  | 39         | 67          | 0.58                    | 50          | 260     |             | 0.20 |
| 14   | BRCA2  | Omentum-S02             | FFPE  | 32         | 58          | 0.55                    | 50          | 185     |             | 0.24 |
| 14   | BRCA2  | Omentum-S03             | FFPE  | 51         | 57          | 0.89                    | 60          | 119     |             | 0.32 |
| 14   | BRCA2  | Parametrium-S01         | FFPE  | 26         | 42          | 0.62                    | 50          | 371     |             | 0.10 |
| 14   | BRCA2  | Right ovary-S01         | FFPE  | 31         | 56          | 0.55                    | 70          | 358     |             | 0.14 |
| 14   | BRCA2  | Right ovary-S02         | FFPE  | 35         | 54          | 0.65                    | 70          | 203     |             | 0.21 |
| 14   | BRCA2  | Left ovary-S01          | FFPE  | 0          | 15          | 0.00                    | 50          | 1213    |             | 0.01 |
| 14   | BRCA2  | Left ovary-S02          | FFPE  | 0          | 5           | 0.00                    | 10          | 732     |             | 0.01 |
| 14   | BRCA2  | Left ovary-S03          | FFPE  | 0          | 16          | 0.00                    | 20          | 792     |             | 0.02 |
| 14   | BRCA2  | Unk-B01                 | fresh | 79         | 85          | 0.929                   | NA          | 60      |             | 0.59 |
| 14   | BRCA2  | Left ovary-S01          | fresh | 35         | 42          | 0.83                    | NA          | 200     |             | 0.17 |
| 14   | BRCA2  | Omentum-S01             | fresh | 39         | 87          | 0.45                    | NA          | 354     |             | 0.20 |
| 14   | BRCA2  | Omentum-S02             | fresh | 30         | 104         | 0.29                    | 10          | 837     |             | 0.11 |
| 14   | BRCA2  | Buffy coat              | fresh | 0          | 0           | 0.00                    | NA          | 203     |             | 0.00 |

Table 2: Digital PCR results for *NF1* and *BRCA2* mutations in HGSOc tissues from cases 8 and 14. AF, allele fraction; FFPE, formalin-fixed paraffin embedded; WT, wild-type
