# Supplementary material for: Spatial and Temporal Heterogeneity in High-Grade Serous Ovarian Cancer: A Phylogenetic Analysis
Source: PubMed Central journal article supplement (PMC4339382; doi:10.1371/journal.pmed.1001789), 2015-02-24
Supplement: pmed.1001789.s023.pdf [file pmed.1001789.s023.pdf]

**Table S3: Primers for digital PCR**

| Primer name         | Sequence                         |
|---------------------|----------------------------------|
| TP53_V216L_F        | TGTGGAGTATTTGGATGACAGAAAC        |
| TP53_V216L_R        | ACCTCAGGCGGCTCATAGG              |
| BRCA2_L2732X_F      | GCCATTATTGAACTTACAGA             |
| BRCA2_L2732X_R      | CTGCCATTCTTTAAGACAG              |
| BRCA2_L2732X_T_6FAM | [6FAM]AAGGCCAGTAAGATCCTCCC[BHQ1] |
| BRCA2_L2732X_N_HEX  | [HEX]AAGGCCAGTTAGATCCTCCC[BHQ1]  |
| TP53_V216L_T_VIC    | [VIC]CTTTTCGACATAGTTTG           |
| TP53_V216L_N_FAM    | [FAM]CTTTTCGACATAGTGTTGGT        |
| NF1_deletion_F      | TTTTGTTTACGAGCACAGATAACC         |
| NF1_deletion_R      | GAAACAGAAGATGACAGCAAAGAA         |

**Table 3: Primers used for Digital PCR experiments** with Fluidigm Biomark microfluidic system
