# Supplementary material for: Spatial and Temporal Heterogeneity in High-Grade Serous Ovarian Cancer: A Phylogenetic Analysis
Source: PubMed Central journal article supplement (PMC4339382; doi:10.1371/journal.pmed.1001789), 2015-02-24
Supplement: pmed.1001789.s024.pdf [file pmed.1001789.s024.pdf]

**Table S4: CNA feature selection results**

| Region index | Chromosome | Start (bp) | End (bp)  | Cytoband                                                                                          |
|--------------|------------|------------|-----------|---------------------------------------------------------------------------------------------------|
| 316          | chr15      | 58643988   | 100286564 | q22.2, q22.31, q22.32, q22.33, q23, q24.1, q24.2, q24.3, q25.1, q25.2, q25.3, q26.1, q26.2, q26.3 |
| 222          | chr9       | 127883987  | 140211216 | q33.3, q34.11, q34.12, q34.13, q34.2, q34.3                                                       |
| 221          | chr9       | 112816993  | 127883306 | q31.3, q32, q33.1, q33.2, q33.3                                                                   |

Table 4: **CNA feature selection results.** Genomic positions of the three most influential regions that separate resistant from sensitive patients as selected by the elastic net.
